# Supplementary material for: Did the Expansion of Insurance Coverage for Oral Health Reduce Self-reported Oral Health Inequalities in Korea? Results of Repeated Cross-Sectional Analysis, 2007–2015
Source: PubMed Central journal article supplement (PMC7661332; doi:10.2188/jea.je20190119), 2020-12-05
Supplement: je-30-537-s001.pdf [file je-30-537-s001.pdf]

**eTable 1.** Stratified prevalence of self-reported poor and very poor oral health according to income by age, gender, and survey years

| Category                     | Men                 |           |                    |           |                     |           | Women               |           |                    |           |                     |           |
|------------------------------|---------------------|-----------|--------------------|-----------|---------------------|-----------|---------------------|-----------|--------------------|-----------|---------------------|-----------|
|                              | K-IV<br>(2007–2009) |           | K-V<br>(2010–2012) |           | K-VI<br>(2013–2015) |           | K-IV<br>(2007–2009) |           | K-V<br>(2010–2012) |           | K-VI<br>(2013–2015) |           |
|                              | Poor                | Very poor | Poor               | Very poor | Poor                | Very poor | Poor                | Very poor | Poor               | Very poor | Poor                | Very poor |
| <b>Childhood/adolescence</b> |                     |           |                    |           |                     |           |                     |           |                    |           |                     |           |
| Low                          | 30.3                | 5.4       | 32.8               | 1.6       | 28.2                | 2.4       | 35.0                | 2.9       | 31.6               | 3.5       | 21.1                | 7.4       |
| Middle-low                   | 27.7                | 4.9       | 22.3               | 2.0       | 17.7                | 3.1       | 31.2                | 1.1       | 20.4               | 2.7       | 14.0                | 2.0       |
| Middle-high                  | 22.3                | 2.4       | 18.0               | 1.2       | 14.6                | 1.0       | 25.4                | 1.3       | 20.0               | 1.7       | 14.7                | 1.8       |
| High                         | 23.3                | 1.2       | 19.2               | 1.2       | 16.9                | 1.3       | 23.2                | 2.0       | 17.0               | 0.8       | 16.1                | 0.1       |
| <b>Young adults</b>          |                     |           |                    |           |                     |           |                     |           |                    |           |                     |           |
| Low                          | 39.6                | 4.9       | 33.0               | 8.5       | 42.4                | 8.5       | 45.2                | 6.0       | 37.2               | 7.1       | 42.8                | 7.2       |
| Middle-low                   | 38.2                | 8.5       | 37.8               | 8.2       | 31.4                | 8.3       | 41.7                | 9.5       | 35.7               | 6.2       | 33.8                | 8.1       |
| Middle-high                  | 36.6                | 7.6       | 36.4               | 4.8       | 34.4                | 6.1       | 38.4                | 6.4       | 39.6               | 4.5       | 31.8                | 4.8       |
| High                         | 36.6                | 5.9       | 37.6               | 5.0       | 31.7                | 5.8       | 36.5                | 4.3       | 32.4               | 4.3       | 28.0                | 3.6       |
| <b>Middle-old adults</b>     |                     |           |                    |           |                     |           |                     |           |                    |           |                     |           |
| Low                          | 45.4                | 12.3      | 37.3               | 17.9      | 46.2                | 13.7      | 45.5                | 10.2      | 44.1               | 12.7      | 37.5                | 10.2      |
| Middle-low                   | 44.6                | 11.7      | 41.8               | 14.2      | 39.5                | 17.2      | 46.1                | 9.4       | 39.7               | 13.4      | 37.0                | 11.0      |
| Middle-high                  | 43.5                | 10.8      | 37.7               | 11.7      | 37.0                | 12.1      | 39.7                | 8.1       | 41.0               | 7.9       | 36.7                | 7.9       |
| High                         | 38.1                | 7.5       | 35.9               | 9.8       | 32.5                | 9.6       | 42.5                | 5.7       | 33.6               | 9.3       | 29.6                | 7.7       |
| <b>Older adults</b>          |                     |           |                    |           |                     |           |                     |           |                    |           |                     |           |
| Low                          | 49.7                | 9.4       | 47.1               | 11.5      | 45.8                | 14.1      | 49.1                | 6.2       | 47.5               | 11.0      | 42.5                | 9.8       |
| Middle-low                   | 45.4                | 7.9       | 43.1               | 8.5       | 38.1                | 12.1      | 46.8                | 5.3       | 45.2               | 8.3       | 41.1                | 7.7       |
| Middle-high                  | 43.8                | 5.0       | 37.0               | 8.3       | 39.8                | 11.3      | 41.4                | 3.8       | 43.2               | 7.0       | 36.4                | 7.1       |
| High                         | 43.5                | 7.0       | 35.1               | 16.3      | 39.2                | 10.6      | 43.8                | 4.3       | 47.2               | 10.3      | 40.1                | 5.0       |

Values reported as percentages.
